# Supplementary material
Source: PubMed Central journal article supplement (PMC3442131)
Supplement: NIHMS368301-supplement-01.pdf [file NIHMS368301-supplement-01.pdf]

## SUPPORTING INFORMATION

### Mercury Sources and Fate in the Gulf of Maine

Elsie M. Sunderland<sup>a\*</sup>, Aria Amirbahman<sup>b</sup>, Neil Burgess<sup>c</sup>, John Dalziel<sup>d</sup>, Gareth Harding<sup>e</sup>, Stephen H. Jones<sup>f</sup>, Elizabeth Kamai<sup>g</sup>, Margaret R. Karagas<sup>g</sup>, Xun Shi<sup>h</sup>, Celia Y. Chen<sup>h</sup>

<sup>a</sup>Harvard University, Department of Environmental Health, School of Public Health, Boston, MA 02115, USA, \* Corresponding author: 617-384-8832 (phone), 617-495-4551 (fax), [elsie\\_sunderland@harvard.edu](mailto:elsie_sunderland@harvard.edu)

<sup>b</sup>University of Maine - Orono, Civil and Environmental Engineering, Orono, ME 04469, USA, [aria@umit.maine.edu](mailto:aria@umit.maine.edu)

<sup>c</sup>Environment Canada, Mount Pearl, NL A1N 4T3, Canada, [neil.burgess@ec.gc.ca](mailto:neil.burgess@ec.gc.ca)

<sup>d</sup>Environment Canada, Dartmouth, NS B2Y 2N6, Canada, [john.dalziel@ec.gc.ca](mailto:john.dalziel@ec.gc.ca)

<sup>e</sup>Fisheries and Oceans Canada, Bedford Institute of Oceanography, Dartmouth, NS B2Y 4A2, Canada, [gareth.harding@dfo-mpo.gc.ca](mailto:gareth.harding@dfo-mpo.gc.ca)

<sup>f</sup>University of New Hampshire, Department of Natural Resources and the Environment, Durham, NH 03824, USA, [shj@cisunix.unh.edu](mailto:shj@cisunix.unh.edu)

<sup>g</sup>Dartmouth Medical School, Section of Biostatistics and Epidemiology, Department of Community and Family Medicine, Lebanon, NH 03756, USA, [margaret.r.karagas@dartmouth.edu](mailto:margaret.r.karagas@dartmouth.edu)

<sup>h</sup>Dartmouth College, Department of Biological Sciences, Hanover, NH 03755, USA, [celia.y.chen@dartmouth.edu](mailto:celia.y.chen@dartmouth.edu)

Table S1. Dietary intake preferences of fish consumers in the Gulf of Maine region

| Author                               | Location                                                | N                                            | Consumers                                          | Type of data                                                                                                                                                                             | Specifics                                                                                                                                                                                                                                                                                          |
|--------------------------------------|---------------------------------------------------------|----------------------------------------------|----------------------------------------------------|------------------------------------------------------------------------------------------------------------------------------------------------------------------------------------------|----------------------------------------------------------------------------------------------------------------------------------------------------------------------------------------------------------------------------------------------------------------------------------------------------|
| Wessells, et al., 1994               | New England (ME, NH, VT, MA, RI, CT)                    | 1533 shellfish surveys, 1529 finfish surveys | Households                                         | % frequent consumers of seafood, shellfish<br><br>% frequent/infrequent/non-consumers of salmon, trout, clams                                                                            | 83% of New England households consume fresh seafood $\geq 1$ /month; 78% consume fresh shellfish $\geq 1$ /month<br><br>72% consume fresh salmon (32.6% $\geq 1$ /month), 56% consume fresh trout (11.8% $\geq 1$ /month), 21.2% consume clams $\geq 1$ /month                                     |
| U.S. Department of Agriculture, 1998 | Northeast (CT, ME, MA, NH, NJ, NY, PA, RI, VT)          | 3000                                         | General population                                 | g fish and shellfish consumed/day, by age and gender<br><br>% individuals consuming fish and shellfish/day, by age and gender<br><br>oz. cooked fish consumed per day, by age and gender | 3-24g/day (lowest ages 1-5, highest males 20-39)<br><br>4.8-14.0 (lowest ages 1-5, highest males 20-39)<br><br>0.2-0.8; mean for ages $>2$ (.5 oz); lowest ages 2-5 and females 6-11; highest males 60+                                                                                            |
| Oken et al., 2003                    | Eastern MA                                              | 2235                                         | Pregnant women (mean age post-advisory 32.1 years) | Servings per month of canned tuna, dark meat fish, shellfish, white meat fish, before and after fish advisory                                                                            | After advisory: mean servings per month of canned tuna (2.1), dark meat fish (1.1), shellfish (1.7), white meat fish (1.5), 4 types combined (6.4), 11% consume $>3$ fish meals/month                                                                                                              |
| Anderson et al., 2004                | ME, CT                                                  | ME: 535<br><br>CT: 180                       | Women of childbearing age (18-45)                  | Fish consumption in past 12 months of all fish, shellfish, sportcaught fish, fish products                                                                                               | ME: 87% ate fish/shellfish in the past 12 months, median number of meals of shellfish (12), fish/tuna (24), sportcaught fish (3)<br>CT: 82% ate fish/shellfish in the past 12 months, median number of meals of shellfish (12), fish/tuna (24), sportcaught fish (4)                               |
| Morrisette et al., 2004              | Canada (St. Lawrence river)                             | 159                                          | Pregnant women (mean age 26.7 years)               | Meals/month of caught and market fish, before/during pregnancy                                                                                                                           | Med number of fish meals/month pre-pregnancy (3.0), median number of meals during pregnancy (2.0)                                                                                                                                                                                                  |
| Knobeloch et al., 2005               | ME, CT                                                  | ME: 535<br><br>CT: 180                       | Women of childbearing age (18-45)                  | Fish consumption in past 12 months of all fish, shellfish, sportcaught fish, fish products                                                                                               | ME: 93% ate fish/shellfish in the past 12 months, median number of meals of all fish (36), shellfish (12), fish/tuna (24), sportcaught fish (4)<br>CT: 93% ate fish/shellfish in the past 12 months, median number of meals of all fish (36), shellfish (12), fish/tuna (24), sportcaught fish (4) |
| Legrand et al., 2005                 | Canada (two communities at Bay of Fundy, New Brunswick) | 143                                          | Adults                                             | Daily fish intake (g) by species                                                                                                                                                         | Grand Manan: ave. marine fish intake was 32 g/day (25 g/day from haddock and pollock), shellfish intake at 18 g/day, canned fish at 12 g/day<br>St. Andrews/St. Stephen: ave. marine fish intake was 10 g/day (5.6 g/day from haddock and                                                          |

|                       |                       |                    |                    |                                                                      |                                                                                                                                                                                                                                                                                                                                                                                                                                                                                                             |
|-----------------------|-----------------------|--------------------|--------------------|----------------------------------------------------------------------|-------------------------------------------------------------------------------------------------------------------------------------------------------------------------------------------------------------------------------------------------------------------------------------------------------------------------------------------------------------------------------------------------------------------------------------------------------------------------------------------------------------|
|                       |                       |                    |                    |                                                                      | pollock), shellfish intake at 8.6 g/day, canned fish at 13 g/day                                                                                                                                                                                                                                                                                                                                                                                                                                            |
| Rees et al., 2006     | NH                    | 27                 | Adults 25-74 years | 4-oz meals of finfish per week                                       | 96% reported eating any finfish at least once per week in simple FFQ, 67% reported eating finfish at least once per week in a detailed interview<br>Mean weekly finfish consumptions estimated were 1.0 (SD 1.2) and 1.2 (SD 0.9) 4-oz portions                                                                                                                                                                                                                                                             |
| Imm et al., 2007      | ME, CT                | ME: 334<br>CT: 118 | Children ages 2-17 | % who consumed fish, of sportcaught/commercial/shellfish, meals/year | ME: 81% ate fish, 9% ate $\geq 2$ meals/wk<br>CT: 83% ate fish, 10% ate $\geq 2$ meals/wk                                                                                                                                                                                                                                                                                                                                                                                                                   |
| Dunn et al., 2008     | MA, ME                | 534                | Children ages 6-10 | Fish consumption frequency                                           | % at beginning of study who consumed fish every day (1.0), $\geq 1$ /week (37.9), $\geq 2$ /month (20.0), $\leq 1$ /month (41.2)                                                                                                                                                                                                                                                                                                                                                                            |
| Moya et al., 2008     | CT                    | 433                | General population | Fish consumption per kg body weight, by age and gender               | .23-.84 g fish consumed per kg body weight per day (lowest males 16<30; highest females 16<30)                                                                                                                                                                                                                                                                                                                                                                                                              |
| Damsky et al., 2009   | Chittenden County, VT | 166                | General population | Meals per month of canned tuna, VT caught fish, high Hg fish, other  | 68% eat $\geq 1$ meal/month canned tuna; 19% eat $\geq 1$ meal/month VT-caught fish; 23% eat $\geq 1$ meal/month high Hg fish; 62% eat $\geq 1$ meal/month all other fish                                                                                                                                                                                                                                                                                                                                   |
| Mahaffey et al., 2009 | USA                   | 5365               | Adult women        | Fish consumed in 30 days                                             | Atlantic Coast consumed most fish in 30 days (followed by Gulf of Mexico, Pacific Coast, Inland South, Inland West, Inland Northeast, Inland Midwest, Great Lakes)<br>No consistent trend in fish consumption by adult women 1999-2004<br>Highest fish consumption in highest income levels ( $\geq \$55000$ /yr)<br>Northeast had the highest percentage of women with BHg concentrations $>2.4 \mu\text{g/L}$ ( $>19\%$ )                                                                                 |
| Wang et al., 2010     | USA                   | 44788              | Adult population   | Changes in meat consumption (g/day/person) over time                 | U-shaped trend in US adults' meat consumption between 1988-1994 and 1999-2004<br>Decrease in men's and women's seafood consumption between 1988-1994 and 1994-1996; increase in overall seafood consumption between 1994-1996 and 1999-2004<br>Increase in seafood consumption between 1994-1996 and 1999-2004 among non-Hispanic white men, non-Hispanic black men and women, <high school education men and women, >high school education men and women, medium-income men, and high-income men and women |
